# Supplementary material for: Ensemble modeling highlights importance of understanding parasite-host behavior in preclinical antimalarial drug development
Source: PubMed Central journal article supplement (PMC7064600; doi:10.1038/s41598-020-61304-8), 2020-03-10
Supplement: 41598_2020_61304_MOESM1_ESM.pdf [file 41598_2020_61304_MOESM1_ESM.pdf]

# 1 Ensemble modeling highlights importance of understanding 2 parasite-host behavior in preclinical antimalarial drug 3 development

4

## 5 **Authors:**

6 Lydia Burgert<sup>1,2</sup>, Matthias Rottmann<sup>1,2</sup>, Sergio Wittlin<sup>1,2</sup>, Nathalie Gobeau<sup>3</sup>, Andreas Krause<sup>4</sup>, Jasper  
7 Dingemans<sup>4</sup>, Jörg J. Möhrle<sup>1,2,3</sup>, Melissa A. Penny\*<sup>1,2</sup>

8 <sup>1</sup> Swiss Tropical and Public Health Institute, Basel, Switzerland

9 <sup>2</sup> University of Basel, Basel, Switzerland

10 <sup>3</sup> Medicines for Malaria Venture, Geneva, Switzerland

11 <sup>4</sup> Idorsia Pharmaceuticals Ltd, Clinical Pharmacology, Allschwil, Switzerland

12 \*Corresponding author: melissa.penny@unibas.ch

13

## 14 **Supplement**

### 15 **Section 1: Data and Drugs**

16 Overview of compounds and data used for analysis of parasite growth *P. berghei* and *P. falciparum* in  
17 their respective murine host and drug efficacy experiments.

18 **Table S1: List of compounds including compound characteristics**

| Drug       | Molecule class      | Mode of action                                                                                             | Literature |
|------------|---------------------|------------------------------------------------------------------------------------------------------------|------------|
| ACT-451840 | phenylalanine-based | Interaction with multidrug resistance protein-1 (PfMDR1), needs further investigation                      | 1,2        |
| CQ         | 4-aminoquinoline    | Inhibits heme polymerization in food vacuole                                                               | 3          |
| MMV390048  | 2-aminopyridine     | Inhibits phosphatidylinositol 4-kinase (PfPI(4)K)                                                          | 3,4        |
| OZ439      | peroxide            | Peroxidative damage and oxidative stress through reductive activation by heme, needs further investigation | 5,6        |

19

20 **Table S2: Overview of data used in fitting parasite growth and drug action parameters (parasite density**  
 21 **data), and concentration-time profiles (concentration time data). Doses are given in mg/kg.**

|                                                                           | Data                        | Concentration time data                                                                                                                                        | Parasite density data                                                                                                                                                                     |
|---------------------------------------------------------------------------|-----------------------------|----------------------------------------------------------------------------------------------------------------------------------------------------------------|-------------------------------------------------------------------------------------------------------------------------------------------------------------------------------------------|
| <b><i>P. berghei</i> in normal mice</b>                                   | Undisturbed parasite growth | -                                                                                                                                                              | No. mice: 215<br>No. experiments: 43<br>Mice per experiment: 2-5<br>Data source: Swiss TPH                                                                                                |
|                                                                           | ACT-451840                  | No. mice: 12<br>No. experiments: 3<br>Mice per dose: 4<br>Quadruple dose: 100<br>Data source: Idorsia                                                          | No. mice: 69<br>No. experiments: 4<br>Mice per dose: 3-5<br>Single dose: 10, 15, 20, 25, 30, 60, 80, 100, 300<br>Triple dose: 3, 10, 2x15, 30, 50, 2x30, 100, 300<br>Data source: Idorsia |
|                                                                           | CQ                          | No. mice: 2<br>No. experiments: 1<br>Mice per dose: 2<br>Single dose: 10, 100, 300<br>Data source: Swiss TPH                                                   | No. mice: 72<br>No. experiments: 8<br>Mice per dose: 2-5<br>Single dose: 3, 10, 30, 100<br>Quadruple dose: 3, 10, 30, 100<br>Data source: Swiss TPH                                       |
|                                                                           | MMV390048                   | No. mice: 9<br>No. experiments: 3<br>Mice per dose: 3<br>Single dose: 1, 10<br>Data source: MMV                                                                | No. mice: 65<br>No. experiments: 3<br>Mice per dose: 3-6<br>Single dose: 0.5, 1, 2, 3, 10, 25, 30<br>Quadruple dose: 0.3, 0.5, 0.8, 1, 3<br>Data source: Swiss TPH                        |
|                                                                           | OZ439                       | No. mice: 6<br>No. experiments: 1<br>Mice per dose: 3<br>Single dose: 30, 100<br>Data source: MMV                                                              | No. mice: 220<br>No. experiments: 13<br>Mice per dose: 5-10<br>Single dose: 0.1, 0.3, 1, 1.5, 2, 3, 5, 10, 15, 20, 25, 30, 50, 100<br>Triple dose: 1, 3, 10<br>Data source: Swiss TPH     |
| <b><i>P. falciparum</i> in NOD<sup>scidIL-2R<sup>c/-</sup></sup> mice</b> | Undisturbed parasite growth | -                                                                                                                                                              | No. mice: 132<br>No. experiments: 32<br>Mice per experiment: 2-8<br>Data source: GSK, Swiss TPH, TAD                                                                                      |
|                                                                           | ACT 451840                  | No. mice: 3<br>No. experiments: 1<br>Mice per dose: 3<br>Single dose: 3<br>Data source: Idorsia                                                                | No. mice: 12<br>No. experiments: 1<br>Mice per dose: 3<br>quadruple dose: 3, 10, 30, 100<br>Data source: Idorsia                                                                          |
|                                                                           | CQ                          | No. mice: 4<br>No. experiments: 1<br>Mice per dose: 4<br>Single dose: 50<br>Data source: Swiss TPH                                                             | No. mice: 14<br>No. experiments: 3<br>Mice per dose: 2-3<br>Single dose: 50 mg/kg<br>Quadruple dose: 2, 5, 10, 50<br>Data source: Swiss TPH                                               |
|                                                                           | MMV390048                   | No. mice: 48<br>No. experiments: 7<br>Mice per dose: 1-2<br>Double dose: 1,10<br>Quadruple dose: 0.25, 0.5, 1, 5, 10, 20<br>Data source: GSK, TAD              | No. mice: 50<br>No. experiments: 7<br>Mice per dose: 1-2<br>Double dose: 1,10,<br>Quadruple dose: 0.25, 0.5, 1, 5, 10, 20<br>Data source: GSK, TAD                                        |
|                                                                           | OZ439                       | No. mice: 34<br>No. experiments: 4<br>Mice per dose: 2<br>Single dose: 0.5, 1, 3, 5, 10, 20, 30, 50, 75, 100<br>Double dose: 25<br>Data source: GSK, Swiss TPH | No. mice: 48<br>No. experiments: 4<br>Mice per dose: 2<br>Single dose: 0.5, 1, 3, 5, 10, 20, 30, 50, 75, 100<br>Double dose: 25<br>Data source: GSK, Swiss TPH                            |

## Section 2: Mechanistic models

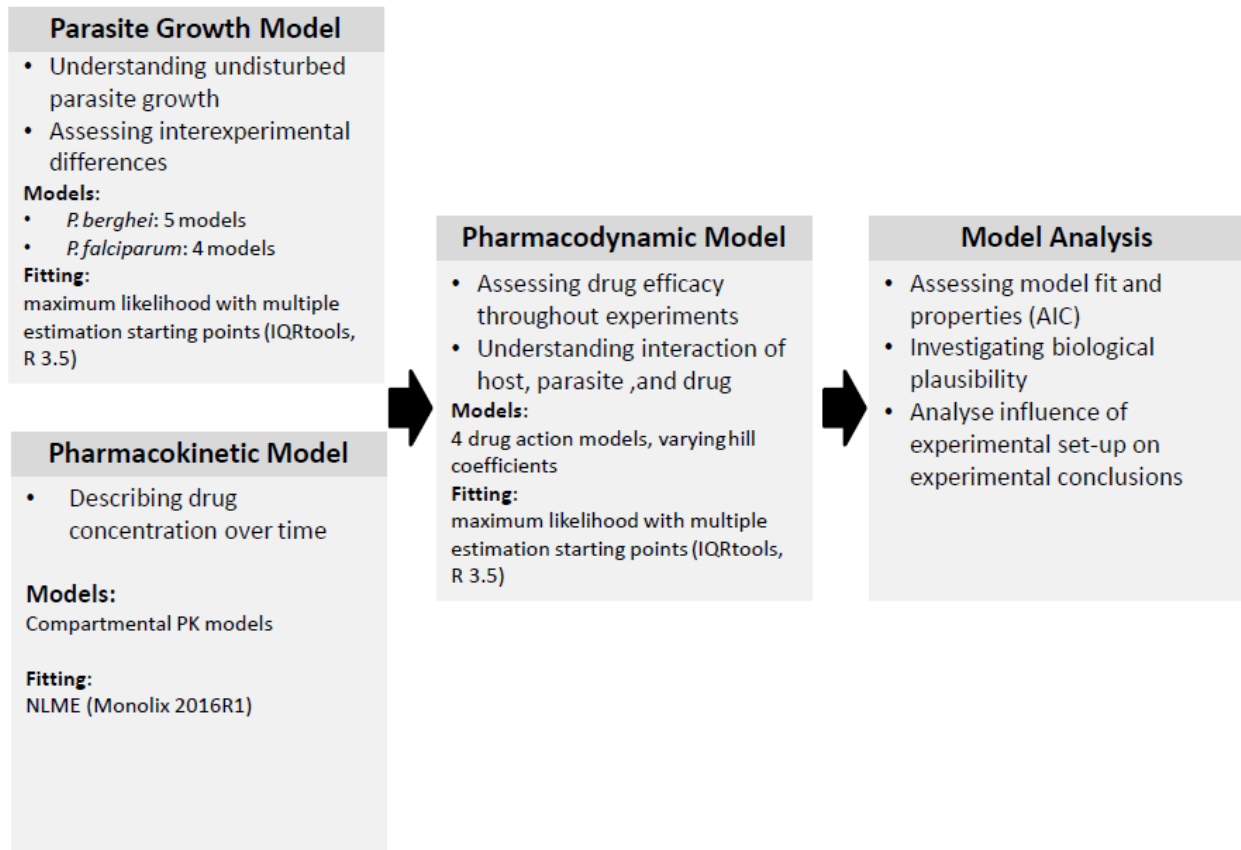

24

25 **Figure S1: Standardized workflow for the systematic analysis of preclinical drug efficacy experiments.** The  
 26 workflow was designed to assist execution of consistent analysis of parasite growth and drug treatment experiments  
 27 in a preclinical setting.

28 **Table S3: Equations (ordinary differential equations) for the parasite growth models.** Models are annotated in a modular construction system. The equation  
 29 for uninfected ( $X$ ) and infected ( $Y$ ) RBCs and merozoites ( $M$ ) for the respective model are listed in the table below. The annotations represent mouse RBCs ( $m$ ),  
 30 human RBCs ( $h$ ) and reticulocytes ( $R$ ). Parameter annotations can be found in Table S4.

|                                                                                                                                                                                                                                                                                                                                                                                                                                                                                                                                                                                                                                |                                                                                                                                                                                                                                                                                                                                                                                                                                                                                                                                                                                                                                  |
|--------------------------------------------------------------------------------------------------------------------------------------------------------------------------------------------------------------------------------------------------------------------------------------------------------------------------------------------------------------------------------------------------------------------------------------------------------------------------------------------------------------------------------------------------------------------------------------------------------------------------------|----------------------------------------------------------------------------------------------------------------------------------------------------------------------------------------------------------------------------------------------------------------------------------------------------------------------------------------------------------------------------------------------------------------------------------------------------------------------------------------------------------------------------------------------------------------------------------------------------------------------------------|
| <p><u>Model a (base)</u></p> $\frac{dX_m}{dt} = v - \mu_{X_m} X_m - \beta X_m M \quad (1)$ $\frac{dY_{Xm,1}}{dt} = \beta X_m M - \alpha Y_{Xm,1} \quad (2)$ $\frac{dY_{Xm,i}}{dt} = \alpha Y_{Xm,i-1} - \alpha Y_{Xm,i}, \quad i = 2, \dots, n \quad (2.1)$ $\frac{dM}{dt} = -\beta(X_m + Y_{Xm})M + \alpha r Y_{Xm,n} - \delta M \quad (3)$ <p>with:</p> $Y_{Xm} = \sum_{i=1}^n Y_{Xm,i}$ $P = \frac{Y_{Xm}}{X_m + Y_{Xm}} 100$ <p>and initial conditions:</p> $X_{m,0} = X_{m,0}, \quad M_0 = 0$ $Y_{Xm,0,i} = \omega \frac{\text{inoculum}}{V_n}$                                                                           | <p><u>Model b (bystander)</u></p> $\frac{dX_m}{dt} = v - (\mu_{X_m} + \gamma)X - \beta X_m M \quad (4)$ $\frac{dY_{Xm,1}}{dt} = \beta X_m M - \alpha Y_{Xm,1} \quad (2)$ $\frac{dY_{Xm,i}}{dt} = \alpha Y_{Xm,i-1} - \alpha Y_{Xm,i}, \quad i = 2, \dots, n \quad (2.1)$ $\frac{dM}{dt} = -\beta(X_m + Y_{Xm})M + \alpha r Y_{Xm,n} - \delta M \quad (3)$ <p>with :</p> $Y_{Xm} = \sum_{i=1}^n Y_{Xm,i}$ $\gamma = \frac{\gamma_{\max} Y_{Xm}}{k\gamma_{50} + Y_{Xm}}$ $P = \frac{Y_{Xm}}{X_m + Y_{Xm}} 100$ <p>and initial conditions:</p> $X_{m,0} = X_{m,0}, \quad M_0 = 0$ $Y_{Xm,0,i} = \omega \frac{\text{inoculum}}{V_n}$ |
| <p><u>Model c (comp. erythr.)</u></p> $\frac{dX_m}{dt} = v - \mu_{X_m} X_m - \beta X_m M \quad (1)$ $\frac{dY_{Xm,1}}{dt} = \beta X_m M - \alpha Y_{Xm,1} \quad (2)$ $\frac{dY_{Xm,i}}{dt} = \alpha Y_{Xm,i-1} - \alpha Y_{Xm,i}, \quad i = 2, \dots, n \quad (2.1)$ $\frac{dM}{dt} = -\beta(X_m + Y_{Xm})M + \alpha r Y_{Xm,n} - \delta M \quad (3)$ <p>with:</p> $Y_{Xm} = \sum_{i=1}^n Y_{Xm,i}$ $v = \frac{v_{\max}}{1 + \frac{X_m + Y_{Xm}}{k v_{50}}} X_{m,0}$ $P = \frac{Y_{Xm}}{X_m + Y_{Xm}} 100$ <p>and initial conditions:</p> $X_{m,0} = X_{m,0}, \quad M_0 = 0$ $Y_{Xm,0,i} = \omega \frac{\text{inoculum}}{V_n}$ | <p><u>Model d (impaired maturation)</u></p> $\frac{dX_m}{dt} = v - \mu_{X_m} X_m - \beta X_m M \quad (1)$ $\frac{dY_{Xm,1}}{dt} = \beta X_m M - l Y_{Xm,1} \quad (2)$ $\frac{dY_{Xm,i}}{dt} = l Y_{Xm,i-1} - l Y_{Xm,i}, \quad i = 2, \dots, n \quad (2.1)$ $\frac{dM}{dt} = -\beta(X_m + Y_{Xm})M + l r Y_{Xm,n} - \delta M \quad (3)$ <p>with:</p> $Y_{Xm} = \sum_{i=1}^n Y_{Xm,i}$ $l = \alpha - \frac{l_{\max} Y_{Xm}^2}{k_{l,50} X_{m,0} Y_{Xm}^2}$ $P = \frac{Y_{Xm}}{X_m + Y_{Xm}} 100$ <p>and initial conditions:</p> $X_{m,0} = X_{m,0}, \quad M_0 = 0$ $Y_{Xm,0,i} = \omega \frac{\text{inoculum}}{V_n}$               |

31 **Table S3: Equations (ordinary differential equations) for the parasite growth models. Continued...**

| <u>Model e (reticulocytes)</u>                                                                                                       | <u>Model f (const. RBC decay)</u>                                                                                                                                                                                                                          |
|--------------------------------------------------------------------------------------------------------------------------------------|------------------------------------------------------------------------------------------------------------------------------------------------------------------------------------------------------------------------------------------------------------|
| $\frac{dR}{dt} = v - \tau_R R - \beta \epsilon R M$ (5)                                                                              | $\frac{dX_h}{dt} = \text{inputRBC} - (\gamma + \lambda)X_h - \beta X_h M$ (10)                                                                                                                                                                             |
| $\frac{dX_m}{dt} = \tau_R R - \mu_{X_m} X_m - \beta X_m M$ (6)                                                                       | $\frac{dX_m}{dt} = v - (\lambda + \mu_{X_m})X_m$ (11)                                                                                                                                                                                                      |
| $\frac{dY_R}{dt} = \beta \epsilon R M - \tau_{Y_R} Y_R - \alpha Y_R$ (7)                                                             | $\frac{dY_{Xh,1}}{dt} = \beta X_h M - \alpha Y_{Xh,1} - (\gamma + \lambda + \varphi)Y_{Xh,1}$ (12)                                                                                                                                                         |
| $\frac{dY_{Xm,1}}{dt} = \beta X_m M + \tau_{Y_R} Y_R - \alpha Y_{Xm,1}$ (8)                                                          | $\frac{dY_{Xh,i}}{dt} = \alpha Y_{Xh,i-1} - (\gamma + \lambda + \varphi)Y_{Xh,i} - \alpha Y_{Xh,i}, i = 2, \dots, n$ (12.1)                                                                                                                                |
| $\frac{dY_{Xm,i}}{dt} = \alpha Y_{Xm,i-1} - \alpha Y_{Xm,i}, i = 2, \dots, n$ (8.1)                                                  | $\frac{dM}{dt} = -\beta(X_h + Y_{Xh})M + \alpha r Y_{Xh,n} - \delta M$ (13)                                                                                                                                                                                |
| with:<br>$Y_{Xm} = \sum_{i=1}^n Y_{Xm,i}$ $P = \frac{Y_{Xm} + Y_R}{X_m + R + Y_{Xm} + Y_R} 100$                                      | with:<br>$Y_{Xh} = \sum_{i=1}^n Y_{Xh,i}$ $v = \frac{v_{\max}}{1 + \frac{X_h + X_m}{Kv_{50}}}$ $\gamma = \frac{\gamma_{\max} Y_{Xh}}{K\gamma_{50} + Y_{Xh}}$ $P = \frac{Y_{Xh}}{X_h + X_m + Y_{Xh}} 100$ $H = \frac{X_h + Y_{Xh}}{X_h + X_m + Y_{Xh}} 100$ |
| and initial conditions:<br>$R_0 = R_0$ $X_{m,0} = X_{m,0}$ $Y_{R,0} = 0$ $Y_{Xm,0,i} = \omega \frac{\text{inoculum}}{V_n}$ $M_0 = 0$ | and initial conditions:<br>$X_h = H_0 10^{10}$ $X_{m,0} = (1 - H_0) 10^{10}$ $Y_{Xh,0,1} = \omega \frac{\text{inoculum}}{V_n}$ $M_0 = 0$                                                                                                                   |

32

33

34

35

36

37

38 **Table S3: Equations (ordinary differential equations) for the parasite growth models. Continued...**

|                                                                                                                                                                                                                                                                                                                                                                                                                                                                                                                                                                                                                                                                                                                                                                                                                                                                                                                                 |                                                                                                                                                                                                                                                                                                                                                                                                                                                                                                                                                                                                                                                                                                           |
|---------------------------------------------------------------------------------------------------------------------------------------------------------------------------------------------------------------------------------------------------------------------------------------------------------------------------------------------------------------------------------------------------------------------------------------------------------------------------------------------------------------------------------------------------------------------------------------------------------------------------------------------------------------------------------------------------------------------------------------------------------------------------------------------------------------------------------------------------------------------------------------------------------------------------------|-----------------------------------------------------------------------------------------------------------------------------------------------------------------------------------------------------------------------------------------------------------------------------------------------------------------------------------------------------------------------------------------------------------------------------------------------------------------------------------------------------------------------------------------------------------------------------------------------------------------------------------------------------------------------------------------------------------|
| <p><b>Model g (dd. RBC decay)</b></p> $\frac{dX_h}{dt} = \text{inputRBC} - (\gamma + \lambda)X_h - \beta X_h M \quad (10)$ $\frac{dX_m}{dt} = v - (\lambda + \mu_{X_m})X_m \quad (11)$ $\frac{dY_{Xh,1}}{dt} = \beta X_h M - \alpha Y_{Xh,1} - (\gamma + \chi + \varphi)Y_{Xh,1} \quad (12)$ $\frac{dY_{Xh,i}}{dt} = \alpha Y_{Xh,i-1} - (\gamma + \chi + \varphi)Y_{Xh,i} - \alpha Y_{Xh,i}, i = 2, \dots, n \quad (12.1)$ $\frac{dM}{dt} = -\beta(X_h + Y_{Xh})M + \alpha r Y_{Xh,n} - \delta M \quad (13)$ <p>with:</p> $Y_{Xh} = \sum_{i=1}^n Y_{Xh,i}$ $\gamma = \frac{Y_{\max} Y_{Xh}}{kY_{50} + Y_{Xh}}$ $\chi = \frac{\chi_{\max} N}{k\chi_{50} + N}, N = X_h + X_m + Y_{Xh}$ $P = \frac{Y_{Xh}}{X_h + X_m + Y_{Xh}} 100$ $H = \frac{X_h + Y_{Xh}}{X_h + X_m + Y_{Xh}} 100$ <p>and initial conditions:</p> $X_h = H_0 10^{10}$ $X_{m,0} = (1 - H_0) 10^{10}$ $Y_{Xh,0,i} = \omega \frac{\text{inoculum}}{Vn}$ $M_0 = 0$ | <p><b>Model h (human RBC)</b></p> $\frac{dX_h}{dt} = \text{inputRBC} - (\gamma + \lambda)X_h - \beta X_h M \quad (10)$ $\frac{dY_{Xh,1}}{dt} = \beta X_h M - \alpha Y_{Xh,1} - (\gamma + \lambda + \varphi)Y_{Xh,1} \quad (12)$ $\frac{dY_{Xh,i}}{dt} = \alpha Y_{Xh,i-1} - (\gamma + \lambda + \varphi)Y_{Xh,i} - \alpha Y_{Xh,i}, i = 2, \dots, n \quad (12.1)$ $\frac{dM}{dt} = -\beta(X_h + Y_{Xh})M + \alpha r Y_{Xh,n} - \delta M \quad (14)$ <p>with:</p> $Y_{Xh} = \sum_{i=1}^n Y_{Xh,i}$ $\gamma = \frac{Y_{\max} Y_{Xh}}{kY_{50} + Y_{Xh}}$ $P = \frac{Y_{Xh}}{X_h + Y_{Xh}} 100$ <p>and initial conditions:</p> $X_h = H_0 10^{10}$ $Y_{Xh,0,i} = \omega \frac{\text{inoculum}}{Vn}$ $M_0 = 0$ |
|                                                                                                                                                                                                                                                                                                                                                                                                                                                                                                                                                                                                                                                                                                                                                                                                                                                                                                                                 | <p><b>Model i (exponential)</b></p> $\frac{dP}{dt} = p_{gr} P \quad (15)$ <p>with initial condition:</p> $P_0 = P_o$                                                                                                                                                                                                                                                                                                                                                                                                                                                                                                                                                                                      |

39

40 **Table S4: Overview of model parameters of the mechanistic parasite growth models developed.** Estimated  
 41 parameters are denoted with Est. in the value column. (uninfected: uninf., infected: inf., calculated: calc.,  
 42 concentration: conc., erythrocyte: RBC)

| Process                | Model     | Parameter      | Value                 | Unit        | Description                                                          | Ref          |
|------------------------|-----------|----------------|-----------------------|-------------|----------------------------------------------------------------------|--------------|
| Mouse RBC dyn.         | a-c, f, g | $\nu$          | $1.04 \times 10^7$    | [cells/mLh] | Rate of RBCs production                                              | <sup>7</sup> |
| Mouse RBC dyn.         | a-g       | $\mu_{x_m}$    | $1.04 \times 10^{-3}$ | [1/h]       | Death rate of uninf. RBCs                                            | <sup>7</sup> |
| Mouse RBC dyn.         | c, f      | $\nu_{max}$    | $2.00 \times 10^{-3}$ | [1/h]       | Maximum effect of total RBC conc. on $\nu$                           |              |
| Mouse RBC dyn.         | c, f      | $k\nu_{50}$    | $1e10$                | [cells/mL]  | Concentration of total RBC concentration achieving $0.5 \nu_{max}$   |              |
| <i>P. berghei</i> dyn. | a-c, e    | $\alpha$       | 0.042 n               | [1/h]       | Death rate of infected RBCs in each age stage                        | <sup>7</sup> |
| <i>P. berghei</i> dyn. | a-h       | $\delta$       | 0.5                   | [1/h]       | Death rate of merozoite                                              | <sup>7</sup> |
| <i>P. berghei</i> dyn. | e         | $\tau_R$       | 0.014                 | [1/h]       | Maturation rate of uninf. reticulocytes                              | <sup>8</sup> |
| <i>P. berghei</i> dyn. | e         | $\epsilon$     | Est.                  | []          | Attraction of parasite to reticulocyte                               | <sup>8</sup> |
| <i>P. berghei</i> dyn. | e         | $\tau_{YR}$    | 0.042                 | [1/h]       | Maturation rate of inf. reticulocytes                                | <sup>8</sup> |
| <i>P. berghei</i> dyn. | d         | $\alpha_0$     | 0.042 n               | [1/h]       | Base death rate of infected RBCs                                     | <sup>7</sup> |
|                        |           | $k_{l,50}$     | Est.                  | [cells/mL]  | Conc. of $Y_{x_m}$ achieving $0.5 l_{max}$                           |              |
|                        |           | $l_{max}$      | 0.2                   | [1/h]       | Maximum death rate of inf. RBCs                                      |              |
| <i>P. falc.</i> dyn.   | f, h      | $\lambda$      | Est.                  | [1/h]       | Base death rate of all RBCs                                          |              |
| <i>P. falc.</i> dyn.   | g         | $\chi$         | Est.                  | [1/h]       | Total RBC conc. induced clearance of RBCs                            |              |
| <i>P. falc.</i> dyn.   | g         | $\chi_{max}$   | Est.                  | [1/h]       | Maximum effect of total RBC concentration on $\chi$                  |              |
| <i>P. falc.</i> dyn.   | g         | $k\chi_{50}$   | Est.                  | [cells/mL]  | Total RBC conc. achieving $0.5 \chi_{max}$                           |              |
| <i>P. falc.</i> dyn.   | i         | $p_{gr}$       | Est.                  | [1/h]       | Replication rate of parasite in exponential growth phase             |              |
| <i>P. falc.</i> dyn.   | f-h       | $\alpha$       | 0.025 n               | [1/h]       | Death rate of inf. RBCs at each age stage                            | <sup>9</sup> |
| Parasite dyn.          | a-h       | n              | 12                    | -           | Number of modeled parasite age stages                                |              |
| Parasite dyn.          | a-h       | $\omega$       | Est.                  | []          | Viability of parasite inoculum                                       |              |
| Parasite dyn.          | a-h       | $\beta$        | Est.                  | [cells/mLh] | Rate of merozoites- RBC contact resulting in infection (infectivity) |              |
| Parasite dyn.          | a-h       | r              | Est.                  | []          | Number of merozoites per inf. RBC                                    |              |
| Parasite dyn.          | b, f-h    | $\gamma$       | Est.                  | [1/h]       | Infection induced RBC clearance                                      |              |
| Parasite dyn.          | b, f-h    | $\gamma_{max}$ | Est.                  | [1/h]       | Maximum effect of inf. RBCs on $\gamma$                              |              |
| Parasite dyn.          | b, f-h    | $k\gamma_{50}$ | Est.                  | [cells/mL]  | Conc. of inf. RBCs resulting $0.5 \gamma_{max}$                      |              |
| Parasite dyn.          | f-h       | $\varphi$      | Est.                  | [1/h]       | Base clearance of inf. RBCs                                          |              |

43

44 **Table S5: Overview of model parameters of the mechanistic parasite growth models developed. . Continued...**

| Process        | Model | Variable                          | Value                 | Unit                                   | Description                                                             | Ref |
|----------------|-------|-----------------------------------|-----------------------|----------------------------------------|-------------------------------------------------------------------------|-----|
| RBC dyn.       | a-g   | $X_m$ ,<br>$X_h$                  | -                     | [cells/mL]<br>[cells/mL]               | Mouse RBC conc.<br>Human RBC conc.                                      |     |
| Parasite dyn.  | a-e   | $Y_{Xm}$ ,<br>$Y_R$ ,<br>$Y_{Xh}$ | -                     | [cells/mL]<br>[cells/mL]<br>[cells/mL] | Inf. mouse RBC conc.<br>Inf. reticulocyte conc.<br>Inf. human RBC conc. |     |
| RBC. dyn       | e     | R                                 |                       | [cells/mL]                             | Reticulocyte conc.                                                      |     |
| Parasite dyn.  | a-h   | M                                 | -                     | [cells/mL]                             | Merozoite conc.                                                         |     |
| Parasite dyn.  | a-h   | P                                 | -                     | [%]                                    | Parasitemia, Percentage inf. RBCs                                       |     |
| RBC dyn.       | f-g   | H                                 | -                     | [%]                                    | Hematocrit; Percentage human RBCs                                       |     |
| Mouse RBC dyn. | a-g   | $X_{m,0}$                         | $10^{10}$<br>or Calc. | [cells/mL]                             | Initial number of mouse RBCs                                            |     |
| RBC dyn.       | a-h   | $X_{h,0}$                         | Calc.                 | [cells/mL]                             | Initial number of human RBCs                                            |     |
| Mouse RBC dyn. | e     | $R_0$                             | $5^8$                 | [cells/mL]                             | Initial number of reticulocytes,<br>5% of $X_{m,0}$                     |     |
| RBC dyn.       | f-h   | $H_0$                             | Est.                  | [%]                                    | Initial percentage of human RBCs <sup>8</sup>                           |     |
| Parasite dyn.  | i     | $P_0$                             | Est.                  | [%]                                    | Initial parasitemia                                                     |     |
| Model input    | a-h   | inoculum                          | Data                  | [c]                                    | Parasite Inoculum                                                       |     |
| Model input    | f-h   | inputRBC                          | Data                  | [c]                                    | RBC injections                                                          |     |
| Mouse RBC dyn. | a-h   | V                                 | 1.23                  | [mL]                                   | Mouse blood volume <sup>10</sup>                                        |     |

45



46 **Table S6: Structural pharmacokinetic models.** Models were built in a nested manner. No covariate model was  
 47 developed. Models were evaluated based on difference in AIC and standard VPCs. Such that the one compartment  
 48 model corresponding to the absorption and elimination strategies in the Table S6,  $Q_1$  and  $V_{p1}$  were set to zero.

| Absorption                  | Elimination                 | Equation (2 compartments)                                                                                                                                                                                                                                                                |
|-----------------------------|-----------------------------|------------------------------------------------------------------------------------------------------------------------------------------------------------------------------------------------------------------------------------------------------------------------------------------|
| <b>1<sup>st</sup> order</b> | linear                      | $\frac{dA_d}{dt} = -k_a A_d + Input$ $\frac{dA_c}{dt} = k_a A_d - \frac{Cl}{V_c} A_c - \frac{Q_1}{V_c} A_c + \frac{Q_1}{V_{p1}} A_{p1}$ $\frac{dA_{p1}}{dt} = \quad \quad \quad + \frac{Q_1}{V_c} A_c - \frac{Q_1}{V_{p1}} A_{p1}$                                                       |
| <b>Michaelis-Menten</b>     | linear                      | $\frac{dA_d}{dt} = -\frac{v_{max} A_d}{V_{max,50+A_d}} + Input$ $\frac{dA_c}{dt} = \frac{v_{max} A_d}{V_{max,50+A_d}} - \frac{Cl}{V_c} A_c - \frac{Q_1}{V_c} A_c + \frac{Q_1}{V_{p1}} A_{p1}$ $\frac{dA_{p1}}{dt} = \quad \quad \quad + \frac{Q_1}{V_c} A_c - \frac{Q_1}{V_{p1}} A_{p1}$ |
| <b>linear</b>               | Linear and Michaelis-Menten | $\frac{dA_d}{dt} = -k_a A_d + Input$ $\frac{dA_c}{dt} = k_a A_d - \frac{Cl}{V_c} A_c - \frac{Q_1}{V_c} A_c + \frac{Q_1}{V_{p1}} A_{p1} - \frac{v_{max} A_d}{V_{max,50+A_d}}$ $\frac{dA_{p1}}{dt} = \quad \quad \quad + \frac{Q_1}{V_c} A_c - \frac{Q_1}{V_{p1}} A_{p1}$                  |

49

| Parameter    | Unit    | Description                                          |
|--------------|---------|------------------------------------------------------|
| $k_a$        | [1/h]   | Absorption rate constant                             |
| CL           | [mL/h]  | Drug Clearance                                       |
| $V_c$        | [mL]    | Volume of distribution                               |
| $Q_1$        | [1/h]   | Inter-compartmental clearance                        |
| $V_{p1}$     | [mL]    | Volume of distribution of the peripheral compartment |
| $v_{max}$    | [1/h]   | Maximum process rate                                 |
| $V_{max,50}$ | [ng/mL] | Drug concentration with half-maximum process rate    |
| Variable     |         |                                                      |
| $A_d$        | [ng]    | Amount of drug in dosing compartment (depot)         |
| $A_c$        | [ng]    | Amount of drug in central compartment                |
| $A_{p1}$     | [ng]    | Amount of drug in peripheral compartment             |

50

51 **Table S7: Drug action models fitted for each drug and parasite growth model combination.** The effect  $E$  was  
 52 added to the parameter of parasite death  $\alpha$  for *model a-h* and directly subtracted from the growth rate  $p_{gr}$  in case of  
 53 *model i*. Bold parameters are calibrated against data during this modeling step.

| Model                  | Equation                                                                                                                                                               | Drug effect                                                                                                    |
|------------------------|------------------------------------------------------------------------------------------------------------------------------------------------------------------------|----------------------------------------------------------------------------------------------------------------|
| <b>Clearance</b>       | $\frac{dY}{dt} = (\dots) - \frac{E_{max}C^\gamma}{EC_{50}^\gamma + C^\gamma}Y$ $\frac{dY_{Cl}}{dt} = \frac{E_{max}C^\gamma}{EC_{50}^\gamma + C^\gamma}Y - Cl_Y Y_{Cl}$ | Parasites $Y$ are damaged by the drug with direct effect, dead parasites $Y_{Cl}$ are cleared with rate $Cl_Y$ |
| <b>Effect</b>          | $\frac{dC_e}{dt} = k_e(C - C_e)$ $E = \frac{E_{max}C_e^\gamma}{EC_{50}^\gamma + C_e^\gamma}$                                                                           | Reversible direct effect with additional effect compartment, incorporates time-delay in drug action            |
| <b>E<sub>max</sub></b> | $E = \frac{E_{max}C^\gamma}{EC_{50}^\gamma + C^\gamma}$                                                                                                                | Direct effect of the drug                                                                                      |
| <b>Turnover</b>        | $E = k_R E_{max} \left( \frac{C^\gamma}{EC_{50}^\gamma + C^\gamma} - E \right)$                                                                                        | Indirect response                                                                                              |

54

| Parameter | Unit       | Description                                                                |
|-----------|------------|----------------------------------------------------------------------------|
| $C$       | [mg/mL]    | Drug concentration                                                         |
| $C_e$     | [mg/mL]    | Drug concentration in effect compartment                                   |
| $Cl_Y$    | [1/h]      | Clearance rate for damaged parasites                                       |
| $E$       | [1/h]      | Effect of the drug                                                         |
| $EC_{50}$ | [mg/mL]    | Drug concentration causing 50% of maximum effect                           |
| $E_{max}$ | [1/h]      | Maximum effect of the drug                                                 |
| $k_e$     | [1/h]      | First order rate constant for drug concentration in effect compartment     |
| $k_R$     | [1/h]      | First order rate constant for biological intermediate                      |
| $\gamma$  | []         | Hill-coefficient, parameter of steepness of the concentration-effect curve |
| $Y_{Cl}$  | [cells/mL] | Parasites killed/damaged by the drug                                       |

55

56  
57  
58  
59

### Section 3: Parameter estimates

**Table S8: Estimated parameter values of *P. berghei* and *P. falciparum* growth models.** Parameter estimation was performed using data specified in Table S2 and equations noted in Table S3. Parameter ranges estimated over all experiments are given for parameters  $\beta$ ,  $H_0$ ,  $P_0$  and  $p_{gr}$ .

| Model                                | Description    | Parameter (95% CI)      | Unit                        | Error (prop, add [% parasitemia]) |
|--------------------------------------|----------------|-------------------------|-----------------------------|-----------------------------------|
| <b>Model a (base)</b>                | $\beta^*$      | 6.7e-11 – 1.7e-10       | [cells/mLh]                 | 0.35, 0.15                        |
|                                      | $r$            | 14.5 (12.6;16.5)        |                             |                                   |
|                                      | $\omega$       | 0.99 (0.99;0.99)        |                             |                                   |
| <b>Model b (bystander)</b>           | $\beta^*$      | 1.94e-10 – 5e-10        | [cells/mLh]                 | 0.35, 0.15                        |
|                                      | $r$            | 11.5 (10;13.2)          |                             |                                   |
|                                      | $\omega$       | 0.28 (0.22;0.35)        |                             |                                   |
|                                      | $\gamma_{max}$ | 0.02 (0.018;0.023)      | [1/h]                       |                                   |
|                                      | $k\gamma_{50}$ | 7.7e-5 (3.15e-5;1.9e-4) | [10 <sup>10</sup> cells/mL] |                                   |
| <b>Model c (comp. erythr.)</b>       | $\beta^*$      | 7.1e-11 – 1.70e-10      | [cells/mLh]                 | 0.37, 0.15                        |
|                                      | $r$            | 14.5 (12.7;16.5)        |                             |                                   |
|                                      | $\omega$       | 0.99 (0.99;0.99)        |                             |                                   |
| <b>Model d (impaired maturation)</b> | $\beta^*$      | 9.8e-11 – 2.4e-10       | [cells/mLh]                 | 0.14, 0.14                        |
|                                      | $r$            | 13.0 (11.4;14.9)        |                             |                                   |
|                                      | $\omega$       | 0.74 (0.53;0.88)        |                             |                                   |
|                                      | $k_{1,50}$     | 0.12 (0.095;0.17)       | [10 <sup>10</sup> cells/mL] |                                   |
| <b>Model e (reticulocytes)</b>       | $\beta^*$      | 7.1e-11 – 1.2e-10       | [cells/mLh]                 | 0.39, 0.14                        |
|                                      | $r$            | 10.6 (9.2;12.1)         | [1/h]                       |                                   |
|                                      | $\omega$       | 0.78 (0.12;0.99)        |                             |                                   |
|                                      | $\epsilon$     | 5.1 (3.5;7.4)           |                             |                                   |
| <b>Model f (const. RBC decay)</b>    | $\beta^*$      | 2.4e-10 – 1.6e-9        | [cells/mLh]                 | 0.31, 0.17                        |
|                                      | $H_0^*$        | 0.40 – 0.69             |                             |                                   |
|                                      | $r$            | 21.3 (18.6;24.5)        |                             |                                   |
|                                      | $\lambda$      | 0.010 (0.0099; 0.010)   | [1/h]                       |                                   |
|                                      | $\gamma_{max}$ | 0.44 (0.38; 0.50)       | [1/h]                       |                                   |
|                                      | $k\gamma_{50}$ | 0.24 (0.21; 0.27)       | [cells/mL]                  |                                   |
|                                      | $\omega$       | 0.29 (0.26; 0.33)       |                             |                                   |
|                                      | $\phi$         | 0.030 (0.023; 0.0340)   | [1/h]                       |                                   |
| <b>Model g (dd. RBC decay)</b>       | $\beta^*$      | 2.0e-10 – 9.2e-10       | [cells/mLh]                 | 0.3, 0.001                        |
|                                      | $H_0^*$        | 0.40 – 0.65             |                             |                                   |
|                                      | $r$            | 22.8 (19.8;26.2)        |                             |                                   |
|                                      | $\omega$       | 0.25 (0.18;0.34)        |                             |                                   |
|                                      | $\chi_{max}$   | 0.018 (0.016;0.021)     | [1/h]                       |                                   |
|                                      | $k\chi_{50}$   | 1.05 (0.91;1.18)        | [10 <sup>10</sup> cells/mL] |                                   |
|                                      | $\gamma_{max}$ | 0.055 (0.041;0.074)     | [1/h]                       |                                   |
|                                      | $K\gamma_{50}$ | 0.10 (0.09;0.12)        | [10 <sup>10</sup> cells/mL] |                                   |
|                                      | $\phi$         | 0.027 ( 0.016;0.047)    | [1/h]                       |                                   |
| <b>Model h (human RBC)</b>           | $\beta^*$      | 2.1e-10 – 8.8e-10       | [cells/mLh]                 | 0.34, 0.00010                     |
|                                      | $H_0^*$        | 0.40 – 0.65             |                             |                                   |
|                                      | $r$            | 22 (21.7;22.3)          |                             |                                   |
|                                      | $\omega$       | 0.36 (0.28;0.46)        |                             |                                   |
|                                      | $\gamma_{max}$ | 0.067 (0.046;0.098)     | [1/h]                       |                                   |
|                                      | $k\gamma_{50}$ | 0.20 (0.17;0.24)        | [10 <sup>10</sup> cells/mL] |                                   |
|                                      | $\lambda$      | 0.008 (0.008;0.008)     | [1/h]                       |                                   |
|                                      | $\phi$         | 0.040 (0.030;0.047)     | [1/h]                       |                                   |
| <b>Model i (exponential)</b>         | $P_0$          | -1.03 -1.52             | [log(P)]                    |                                   |
|                                      | $p_{gr}$       | 0.16 – 0.30             | [1/h]                       |                                   |

60 \* range of values found over all experiments

61 **Table S9: Estimates of the pharmacokinetic profile parameters for each investigated drug in infected mice.**  
 62 Estimates are given with their residual standard error [%]. Rates are given in [1/h], concentrations in [mg/mL] and  
 63 volume in [mL]. Parameters were estimated using a NLME approach in Monolix (2016R1).

| Drug       | comp | Abs. | Elim        | $k_a$<br>[1/h] | CL<br>[mL/h] | $V_c$<br>[mL] | $Q_1$<br>[1/h]   | $V_{pl}$<br>[mL] | $V_{max}$<br>[1/h] | $V_{max,50}$<br>[ng/mL] | Rel.<br>err  |
|------------|------|------|-------------|----------------|--------------|---------------|------------------|------------------|--------------------|-------------------------|--------------|
| ACT-451840 | 2    | MM   | lin.        | -              | 51<br>(8)    | 91<br>(25)    | 1.09<br>(1.45e4) | 0.08<br>(2.25e4) | 0.89<br>(29)       | 5.47<br>(36)            | 0.31<br>(15) |
| CQ         | 2    | lin. | lin.        | 0.73<br>(23)   | 29<br>(5)    | 218<br>(12)   | 4.34<br>(47)     | 100<br>(24)      |                    |                         | 0.27<br>(11) |
| MMV390048  | 1    | lin. | MM,<br>lin. | 0.23<br>(16)   | 730<br>(13)  | 480<br>(21)   |                  |                  | 0.32<br>(21)       | 4.5<br>(121)            | 0.21<br>(11) |
| OZ439      | 2    | lin. | lin.        | 2.7<br>(63)    | 51<br>(14)   | 466<br>(19)   | 17<br>(211)      | 183<br>(534)     |                    |                         | 0.32<br>(25) |
| ACT-451840 | 1    | lin. | lin.        | 0.047<br>(14)  | 210<br>(11)  | 109<br>(47)   |                  |                  |                    |                         | 0.27<br>(24) |
| CQ         | 1    | lin. | lin.        | 26<br>(7480)   | 68<br>(32)   | 630<br>(30)   |                  |                  |                    |                         | 0.17<br>(17) |
| MMV390048  | 1    | lin. | MM,<br>lin. | 30<br>(7)      | 130<br>(4)   | 280<br>(33)   |                  |                  | 0.68<br>(5)        | 20<br>(22)              | 0.34<br>(4)  |
| OZ439      | 2    | lin. | lin.        | 2.84<br>(19)   | 1.7<br>(-)   | 686<br>(9)    | 63<br>(5)        | 1.71e5<br>(34)   |                    |                         | 0.52<br>(5)  |

*P. berghei* in normal mice  
*P. berghei* in NOD scidIL-2R<sup>c/-</sup> mice  
*P. falciparum* in NOD scidIL-2R<sup>c/-</sup> mice

64  
65

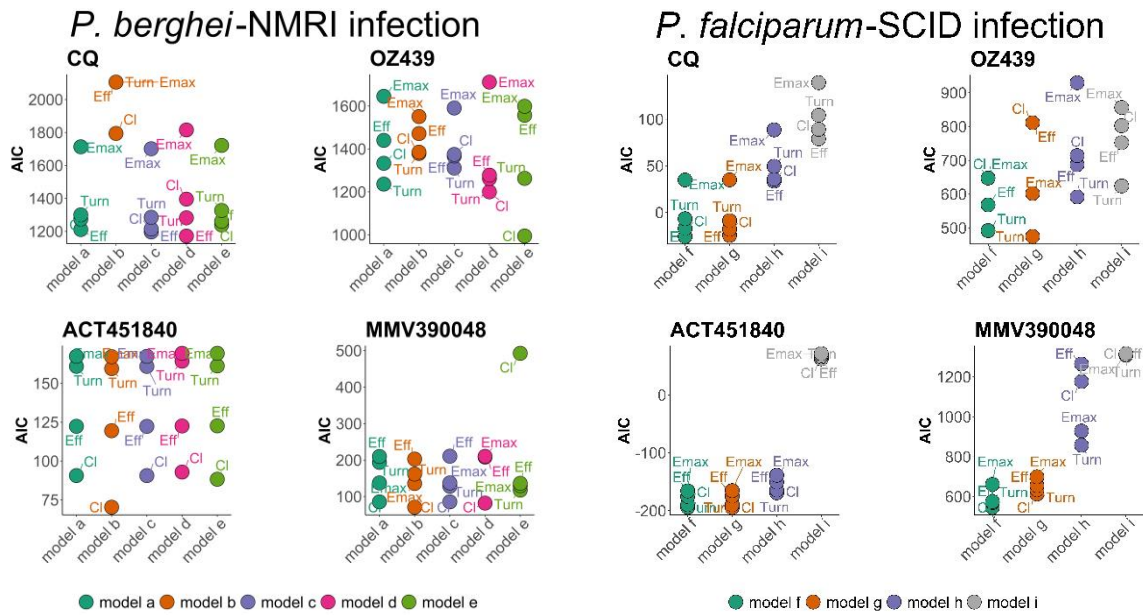

66

67

68 **Figure S2: Selection of model of drug action based on AIC for the two murine experimental systems and four**  
 69 **drugs.** Models were selected based on lowest AIC and biological plausibility of the estimated parameters ( $E_{max}$ ,  
 70  $EC_{50}$  and additional parameter). Models excluded due to biologically implausible parameters are set in parentheses.

71

72

73 **Table S10: Estimated values of drug efficacy parameters.** For each parasite growth model (PG), the drug action  
 74 model with hill-coefficient  $n$  describing data best ( $\Delta$ OFV) was chosen for comparison (see equations for drug action  
 75 model in Table S6). Parameters are stated with their 95% confidence interval. Additional parameters are  $k_e$  for the  
 76 effect model,  $k_R$  for the turnover model and  $Cl_Y$  for the clearance model.

|                                             | Drug       | PG       | Drug action | $\gamma$      | $EC_{50}$ [ng/mL]<br>(95% CI) | $E_{max}$ [1/h]<br>(95% CI) | Add. parameter[1/h]<br>(95 % CI) |
|---------------------------------------------|------------|----------|-------------|---------------|-------------------------------|-----------------------------|----------------------------------|
| <i>P. berghei</i> in normal mice            | ACT-451840 | <i>a</i> | Clearance   | 5             | 1.1e2 (91;1.3 e2)             | 0.71 (0.41;1.2)             | 0.027 (0.025;0.029)              |
|                                             |            | <i>b</i> | Clearance   | 5             | 92 (82;1.0 e2)                | 0.50 (0.35;0.71)            | 0.026 (0.022;0.029)              |
|                                             |            | <i>c</i> | Clearance   | 5             | 1.1e2 (91;1.3 e2)             | 0.71 (0.41;1.2)             | 0.027 (0.025;0.029)              |
|                                             |            | <i>d</i> | Clearance   | 5             | 1e2 (85;1.2e2)                | 0.63 (0.41;0.97)            | 0.028 (0.026;0.031)              |
|                                             |            | <i>e</i> | Clearance   | 5             | 98 (85;1.1e2)                 | 0.60 (0.40;0.91)            | 0.032 (0.030;0.034)              |
|                                             | CQ         | <i>a</i> | Effect      | 7             | 41 (39;43)                    | 0.095 (0.093;0.097)         | 0.037 (0.036;0.038)              |
|                                             |            | <i>b</i> | Clearance   | 5             | 1.2e2 (98;1.4e2)              | 0.42 (0.35;0.50)            | 2.8e-3 (9.8e-5;4.8e-3)           |
|                                             |            | <i>c</i> | Effect      | 7             | 41 (39;43)                    | 0.094 (0.092;0.096)         | 0.035 (0.034;0.037)              |
|                                             |            | <i>d</i> | Effect      | 2             | 46(43;50)                     | 0.11 (0.11;0.11)            | 0.030 (0.028;0.031)              |
|                                             |            | <i>e</i> | Clearance   | 7             | 88 (83;94)                    | 0.34 (0.33;0.35)            | 0.053 (0.051;0.055)              |
|                                             | MMV-390048 | <i>a</i> | Clearance   | 5             | 3.7e2 (3.3e2;4.1e2)           | 0.61 (0.45;0.83)            | 0.039 (0.035;0.043)              |
|                                             |            | <i>b</i> | Clearance   | 7             | 2.8e2 (2.6e2;3.0e2)           | 0.39 (0.31;0.48)            | 0.036 (0.032;0.042)              |
|                                             |            | <i>c</i> | Clearance   | 5             | 3.7e2 (3.3e2;4.1e2)           | 0.61 (0.45;0.83;            | 0.039 (0.036;0.043)              |
|                                             |            | <i>d</i> | Clearance   | 5             | 3.1e2 (2.8e2;3.5e2)           | 0.45 (0.36;0.58)            | 0.041 (0.037;0.045)              |
|                                             |            | <i>e</i> | Turnover    | 2             | 2.2e2 (1.7e2;3.0e2)           | 0.19 (0.070;0.50)           | 0.055 (0.0054;0.55)              |
| OZ439                                       | <i>a</i>   | Turnover | 7           | 49 (47;50)    | 0.93 (0.90;0.95)              | 0.013 (0.012;0.014)         |                                  |
|                                             | <i>b</i>   | Turnover | 7           | 49 (46;52)    | 0.94 (0.35;2.5)               | 0.013 (0.004;0.038)         |                                  |
|                                             | <i>c</i>   | Turnover | 7           | 42 (40;45)    | 0.28 (0.25;0.31)              | 0.060 (0.050;0.072)         |                                  |
|                                             | <i>d</i>   | Turnover | 7           | 46 (44;48)    | 0.84 (0.82;0.86)              | 0.015 (0.014;0.016)         |                                  |
|                                             | <i>e</i>   | Turnover | 7           | 46 (44;47)    | 0.91 (0.89;0.94)              | 0.014 (0.013;0.015)         |                                  |
| <i>P. falciparum</i> in NOD scidIL-2R' c-/- | ACT-451840 | <i>f</i> | Turnover    | 5             | 17 (16;19)                    | 0.093 (0.080;0.11)          | 0.062 (0.041;0.091)              |
|                                             |            | <i>g</i> | Turnover    | 5             | 17 (16;19)                    | 0.095 (0.082; 0.11)         | 0.063 (0.062;0.073)              |
|                                             |            | <i>h</i> | Turnover    | 5             | 18 (17;19)                    | 0.094 (0.082;0.11)          | 0.061 (0.041;0.088)              |
|                                             |            | <i>i</i> | Clearance   | 5             | 16 (15;18)                    | 0.065 (0.062;0.067)         | 0.17 (0.14;0.19)                 |
|                                             | CQ         | <i>f</i> | Effect      | 7             | 71 (67;76)                    | 0.098 (0.094;0.10)          | 0.044 (0.040;0.061)              |
|                                             |            | <i>g</i> | Effect      | 7             | 71 (67;75)                    | 0.10 (0.095;0.10)           | 0.044 (0.038;0.059)              |
|                                             |            | <i>h</i> | Effect      | 7             | 70 (66;74)                    | 0.098 (0.094;0.10)          | 0.045 (0.038;0.059)              |
|                                             |            | <i>i</i> | Effect      | 7             | 70 (66;75)                    | 0.099 (0.092;0.11)          | 0.050 (0.042;0.060)              |
|                                             | MMV-390048 | <i>f</i> | Clearance   | 2             | 1.2e2 (1.1e2;1.3e2)           | 0.090 (0.087;0.091)         | 0.071 (0.065;0.077)              |
|                                             |            | <i>g</i> | Clearance   | 5             | 1.1e2 (1.1 e2;1.2e2)          | 0.093 (0.091;0.096)         | 0.068 (0.062;0.073)              |
|                                             |            | <i>h</i> | Turnover    | 7             | 1.1e2 (1.0e2;1.1e2)           | 0.082 (0.080;0.084)         | 0.073 (0.063;0.083)              |
|                                             |            | <i>i</i> | Clearance   | 5             | 32 (29;35)                    | 0.12 (0.11;0.13)            | 0.025 (0.023;0.028)              |
|                                             | OZ439      | <i>f</i> | Turnover    | 5             | 75 (71;79)                    | 0.26 (0.25;0.26)            | 0.016 (0.015;0.017)              |
|                                             |            | <i>g</i> | Turnover    | 5             | 80 (76;85)                    | 0.33 (0.32;0.34)            | 0.013 (0.012;0.014)              |
|                                             |            | <i>h</i> | Turnover    | 5             | 77 (73;82)                    | 0.30 (0.30;0.31)            | 0.013 (0.013;0.014)              |
| <i>i</i>                                    |            | Turnover | 2           | 213 (197;230) | 0.67 (0.63;0.72)              | 0.020 (0.018;0.023)         |                                  |

78

## Section 4: Additional Findings

79 **Table S11: Overview of experimental data of drug efficacy for *P. falciparum* infected NOD<sup>scidIL-2R' c/-</sup> -mice**  
 80 **treated with MMV390048 and OZ439.** Only experiments conducted for sufficient duration parasites to recrudescence  
 81 are listed. The total number of mice treated with the treatment regimen is split into mice cured and mice  
 82 demonstrating recrudescence. For the remaining mice treatment did not decrease parasite numbers below the lower  
 83 limit of quantification (0.01% parasitemia).

|                  | <b>Treatment regimen</b> | <b>no. mice</b> | <b>mice cured</b> | <b>mice with recrudescence</b> | <b>Time of recrudescence [hours after inoculation]</b> |
|------------------|--------------------------|-----------------|-------------------|--------------------------------|--------------------------------------------------------|
| <b>MMV390048</b> | 2×1 mg/kg                | 4               | 0                 | 0                              | -                                                      |
|                  | 2×10 mg/kg               | 5               | 0                 | 2                              | 336, 408                                               |
|                  | 4×0.25mg/kg              | 4               | 0                 | 0                              | -                                                      |
|                  | 4×0.5 mg/kg              | 8               | 0                 | 0                              | -                                                      |
|                  | 4×1 mg/kg                | 8               | 0                 | 6                              | 336, 456, 504, 504, 576, 624                           |
|                  | 4×2.5 mg/kg              | 6               | 2                 | 4                              | 288, 576 ,576, 744                                     |
|                  | 4×5 mg/kg                | 2               | 2                 | 0                              | -                                                      |
|                  | 4×10 mg/kg               | 4               | 2                 | 2                              | 672,744                                                |
|                  | 4×20 mg/kg               | 2               | 2                 | 0                              | -                                                      |
| <b>OZ439</b>     | 1×2.5 mg/kg              | 2               | 0                 | 0                              | -                                                      |
|                  | 1×5 mg/kg                | 2               | 0                 | 0                              | -                                                      |
|                  | 1×10 mg/kg               | 6               | 0                 | 0                              | -                                                      |
|                  | 1×20 mg/kg               | 2               | 0                 | 2                              | 288, 288                                               |
|                  | 1×30 mg/kg               | 2               | 0                 | 2                              | 336, 480                                               |
|                  | 1×50 mg/kg               | 2               | 0                 | 2                              | 576, 624                                               |
|                  | 1×75 mg/kg               | 2               | 0                 | 2                              | 408, 672                                               |
|                  | 1×100 mg/kg              | 2               | 2                 | 0                              | -                                                      |
|                  | 2×10 mg/kg               | 4               | 0                 | 4                              | 240, 240, 288, 336                                     |
|                  | 2×25 mg/kg               | 4               | 0                 | 4                              | 408, 456, 504, 672                                     |

84

85 **Table S11: Individual slopes of parasite treatment curves and time of recrudescence for treatment with**  
 86 **MMV390048 and OZ439 in SCID mice.** The slopes of the parasite count curves after treatment were determined  
 87 directly from the data.

| <b>MMV390048</b>                                       |                       |               |  | <b>OZ439</b>                                           |                       |               |  |
|--------------------------------------------------------|-----------------------|---------------|--|--------------------------------------------------------|-----------------------|---------------|--|
| <b>Time of recrudescence [hours after inoculation]</b> | <b>Dosing Regimen</b> | <b>-slope</b> |  | <b>Time of recrudescence [hours after inoculation]</b> | <b>Dosing Regimen</b> | <b>-slope</b> |  |
| 288                                                    | 4×2.5 mg/kg           | 0.0100        |  | 240                                                    | 2×10 mg/kg            | 0.0030        |  |
| 336                                                    | 4×1 mg/kg             | 0.0075        |  | 240                                                    | 2×10 mg/kg            | 0.0021        |  |
| 336                                                    | 2×10 mg/kg            | 0.0092        |  | 288                                                    | 1×20 mg/kg            | 0.0281        |  |
| 408                                                    | 2×10 mg/kg            | 0.0073        |  | 288                                                    | 1×20 mg/kg            | 0.0264        |  |
| 456                                                    | 4×1 mg/kg             | 0.0054        |  | 288                                                    | 2×10 mg/kg            | 0.0020        |  |
| 504                                                    | 4×1 mg/kg             | 0.0108        |  | 336                                                    | 1×30 mg/kg            | 0.0256        |  |
| 504                                                    | 4×1 mg/kg             | 0.0108        |  | 336                                                    | 2×10 mg/kg            | 0.0061        |  |
| 576                                                    | 4×1 mg/kg             | 0.0213        |  | 408                                                    | 1×75 mg/kg            | 0.0174        |  |
| 576                                                    | 4×2.5 mg/kg           | 0.0117        |  | 408                                                    | 2×25 mg/kg            | 0.0085        |  |
| 576                                                    | 4×2.5 mg/kg           | 0.0117        |  | 456                                                    | 2×25 mg/kg            | 0.0058        |  |
| 624                                                    | 4×1 mg/kg             | 0.0113        |  | 480                                                    | 1×30 mg/kg            | 0.0281        |  |
| 672                                                    | 4×10 mg/kg            | 0.0088        |  | 504                                                    | 2×25 mg/kg            | 0.0071        |  |
| 744                                                    | 4×2.5 mg/kg           | 0.0129        |  | 576                                                    | 1×50 mg/kg            | 0.0291        |  |
| 744                                                    | 4×10 mg/kg            | 0.0091        |  | 624                                                    | 1×50 mg/kg            | 0.0337        |  |
|                                                        |                       |               |  | 672                                                    | 1×75 mg/kg            | 0.0296        |  |
|                                                        |                       |               |  | 672                                                    | 2×25 mg/kg            | 0.0080        |  |

88



89 **Table S12: Regression analysis for slope of parasite treatment curve and recrudescence times.** Ordinary linear  
 90 regression (least-squares) was conducted to analyze the correlation between time of recrudescence (y) for each  
 91 individual mouse and the slope of the parasite concentration curve after treatment calculated from individual mouse  
 92 data ( $x_1, b_1$ ), number of doses ( $x_2, b_2$ ), and dosing amount ( $x_3, b_3$ ) using the regression equation  $y = b_1 x + b_2 x + b_3 x$   
 93  $+ b_0$ . We tested all combinations of predictors. The data used for the analysis can be found in Table S10 and Table  
 94 S11.

|                  | <b>Slope <math>b_1</math><br/>(p-value)</b> | <b>Regimen <math>b_2</math><br/>(p-value)</b> | <b>Dose <math>b_3</math><br/>(p-value)</b> | <b>Regression<br/>p-value</b> | <b>R<sup>2</sup></b> |
|------------------|---------------------------------------------|-----------------------------------------------|--------------------------------------------|-------------------------------|----------------------|
| <b>MMV390048</b> | 13440<br>(0.240)                            | -                                             | -                                          | 0.240                         | 0.0392               |
|                  | -                                           | -                                             | 3.3<br>(0.761)                             | 0.761                         | -0.07                |
|                  | -                                           | 89<br>(0.116)                                 | -                                          | 0.165                         | 0.125                |
|                  | 9434<br>(0.404)                             | 76<br>(0.194)                                 | -                                          | 0.214                         | 0.107                |
|                  | 16486<br>(0.187)                            | -                                             | 8.4<br>(0.454)                             | 0.386                         | 0.00625              |
|                  | -                                           | 169<br>(0.0171)                               | 23<br>(0.0608)                             | 0.0492                        | 0.317                |
|                  | 14558<br>(0.142)                            | 163<br>(0.167)                                | 27<br>(0.0300)                             | 0.0442                        | 0.401                |
| <b>OZ439</b>     | 4936<br>(0.133)                             | -                                             | -                                          | 0.133                         | 0.0932               |
|                  | -                                           | -                                             | 4.5<br>(0.008)                             | 0.00780                       | 0.363                |
|                  | -                                           | -66<br>(0.396)                                | 0                                          | 0.396                         | -0.01                |
|                  | -                                           | 169<br>(0.00793)                              | 23<br>(0.00793)                            | 0.0183                        | 0.377                |
|                  | 23486<br>(0.0215)                           | 448<br>(0.0493)                               | -                                          | 0.0455                        | 0.283                |
|                  | 249<br>(0.942)                              | -                                             | 4.4<br>(0.0359)                            | 0.0340                        | 0.314                |
|                  | 25009<br>(0.000267)                         | 645<br>(0.000148)                             | 6.2<br>(0.000112)                          | 6.80e-5                       | 0.786                |

95

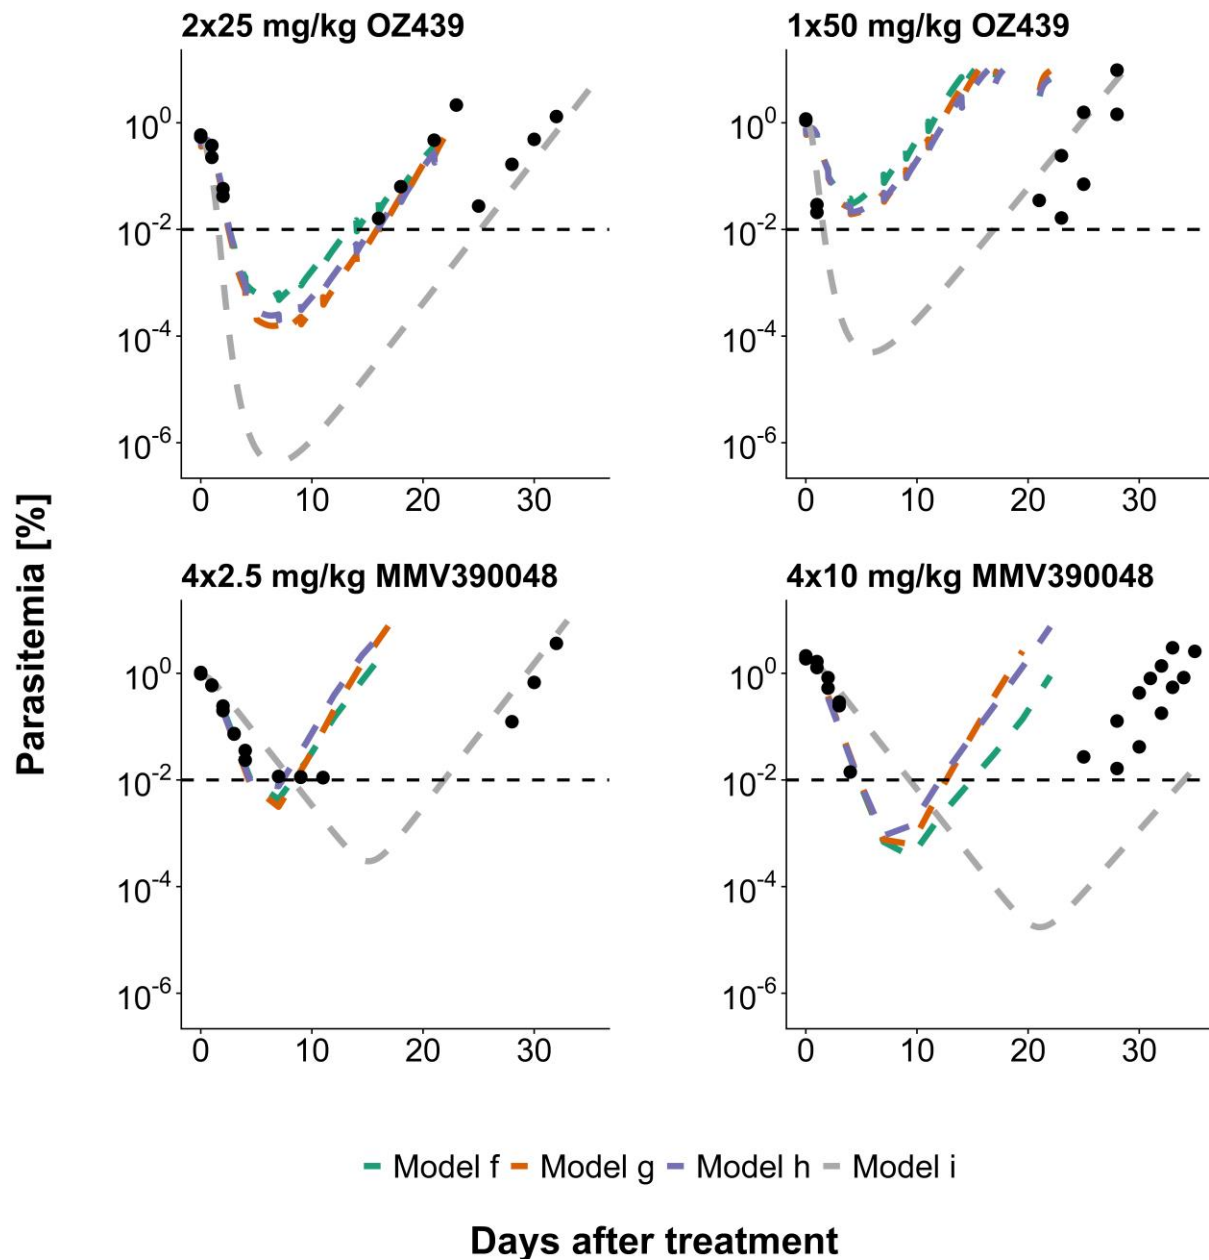

96

97 **Figure S3: Typical fit of drug action models of SCID mice infected with *P. falciparum***  
 98 **demonstrating late recrudescence.** Infection occurred at day 0 with an inoculum of  $2 \times 10^7$ - $3.5 \times 10^7$   
 99 infected RBCs. Treatment commenced three days after inoculation in dosing intervals of 24 hours. Mice  
 100 were treated with 2x25 mg/kg OZ439, 1x50 mg/kg OZ439, 4x2.5 mg/kg MMV390048 or 4x10 mg/kg  
 101 MMV390048. n=2 mice for all doses shown.

102

103

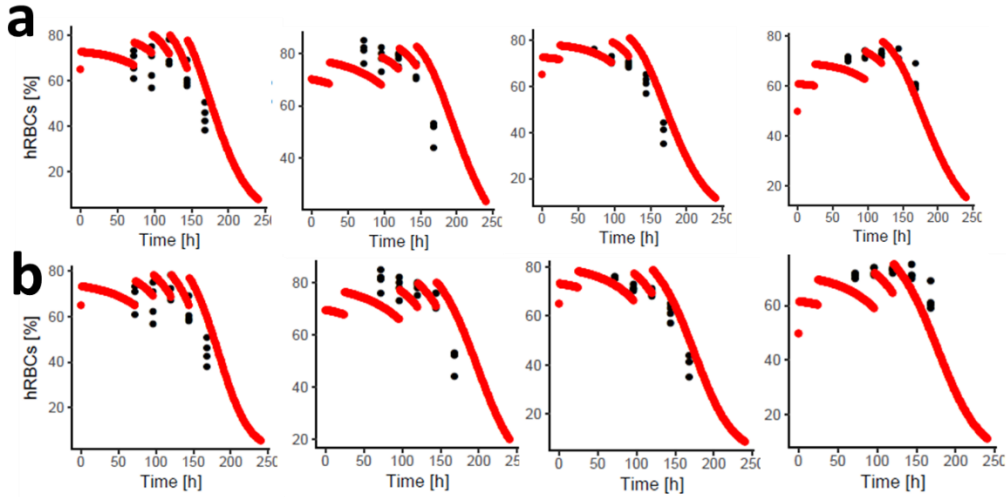

104

105 **Figure S4: The influence of ceasing human erythrocyte injections in SCID mice infected with *P. falciparum*.**  
 106 Data (black ●) and model output (red line) of four experiments, with human RBC injections ceasing before data  
 107 collection, is shown for (a) *model f* (*const. RBC decay*) and (b) *model g* (*dd. RBC decay*). RBC injections are  
 108 indicated by sudden increase in hRBCs in the model output.

109

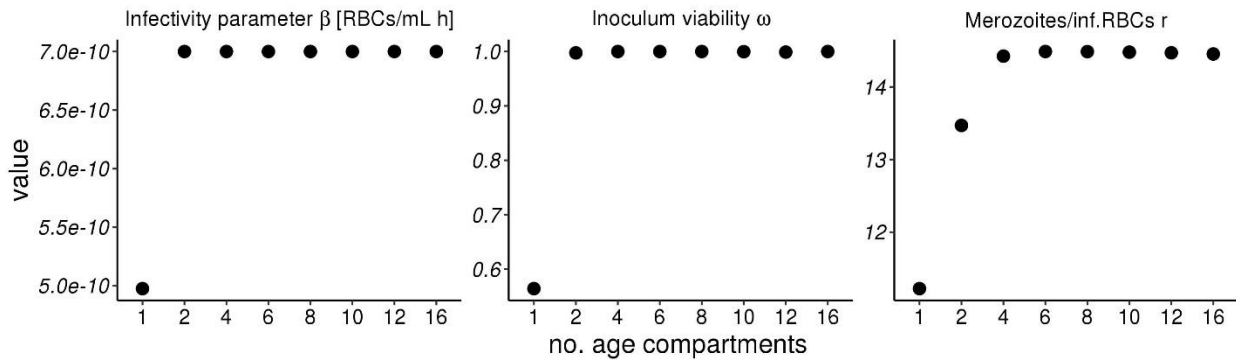

110

111 **Figure S5: Stability analysis conducted for the base structure of the models (corresponding to *model a* (*base*)**  
 112 **towards the number of intra-erythrocytic parasite age-stages.** Total values of parameter estimates for *model a*  
 113 (*base*) including  $n=1,2,..,16$  age compartments show the most prominent influence of the number of age  
 114 compartments between one and two compartments with no distinctive contribution of additional age compartments.  
 115 Considering the stability analysis and computational efficacy, we chose  $n=12$  splitting the parasite life cycle in time-  
 116 steps of two hours for *P.berghei* and four hours for *P.falciparum* considering the stability analysis and  
 117 computational efficacy.

118

119

120 **References**

- 121 1 Boss, C. *et al.* Discovery and characterization of ACT-451840: an antimalarial drug with a novel  
122 mechanism of action. *ChemMedChem* **11**, 1995-2014, doi:10.1002/cmdc.201600298 (2016).
- 123 2 Le Bihan, A. *et al.* Characterization of novel antimalarial compound ACT-451840: preclinical  
124 assessment of activity and dose-efficacy modeling. *PLoS medicine* **13**, e1002138,  
125 doi:10.1371/journal.pmed.1002138 (2016).
- 126 3 Phillips, M. A. *et al.* Malaria. *Nature Reviews Disease Primers* **3**, 17050,  
127 doi:10.1038/nrdp.2017.50 (2017).
- 128 4 Paquet, T. *et al.* Antimalarial efficacy of MMV390048, an inhibitor of Plasmodium  
129 phosphatidylinositol 4-kinase. *Science translational medicine* **9**,  
130 doi:10.1126/scitranslmed.aad9735 (2017).
- 131 5 Dong, Y. *et al.* Structure-activity relationship of the antimalarial ozonide artefenomel (OZ439). *J*  
132 *Med Chem* **60**, 2654-2668, doi:10.1021/acs.jmedchem.6b01586 (2017).
- 133 6 Charman, S. A. *et al.* Synthetic ozonide drug candidate OZ439 offers new hope for a single-dose  
134 cure of uncomplicated malaria. *Proceedings of the National Academy of Sciences of the United*  
135 *States of America* **108**, 4400-4405, doi:10.1073/pnas.1015762108 (2011).
- 136 7 Hetzel, C. & Anderson, R. M. The within-host cellular dynamics of bloodstage malaria:  
137 theoretical and experimental studies. *Parasitology* **113**, 25-38 (1996).
- 138 8 Cromer, D., Evans, K. J., Schofield, L. & Davenport, M. P. Preferential invasion of reticulocytes  
139 during late-stage *Plasmodium berghei* infection accounts for reduced circulating reticulocyte  
140 levels. *International Journal for Parasitology* **36**, 1389-1397,  
141 doi:<https://doi.org/10.1016/j.ijpara.2006.07.009> (2006).
- 142 9 Angulo-Barturen, I. *et al.* A murine model of falciparum-malaria by in vivo selection of  
143 competent strains in non-myelodepleted mice engrafted with human erythrocytes. *PLoS One* **3**,  
144 e2252, doi:10.1371/journal.pone.0002252 (2008).
- 145 10 Lloyd, S. W. M. in *Handbook of Laboratory Animal Management and Welfare* Vol. 3 Ch. 9,  
146 (Blackwell Publishing, 2003).

147
